# Supplementary material for: Stem Cell Research Tools in Human Metabolic Disorders: An Overview
Source: MDPI journal article supplement (doi:10.3390/cells10102681), 2021-10-07
Supplement: s1 [file s1]

|                            | Stem Cell type | Landmark reports                                                                                                                                                                                                                                                                                                          |
|----------------------------|----------------|---------------------------------------------------------------------------------------------------------------------------------------------------------------------------------------------------------------------------------------------------------------------------------------------------------------------------|
| Type 1 Diabetes            | HSCs           | Voltarelli J.C. <i>et al.</i> , 2007<br>D'Addio F., 2014<br>Ye L. <i>et al.</i> , 2017                                                                                                                                                                                                                                    |
|                            | MSCs           | Cai J. <i>et al.</i> , 2016<br>Ulyanova O. <i>et al.</i> , 2019                                                                                                                                                                                                                                                           |
| Type 2 Diabetes            | iPSCs          | Alipio Z. <i>et al.</i> , 2010                                                                                                                                                                                                                                                                                            |
|                            | MSCs           | Bhansali A. <i>et al.</i> , 2014<br>Bhansali S. <i>et al.</i> , 2017<br>Al Demour S. <i>et al.</i> , 2018<br>Chen Y. <i>et al.</i> , 2018                                                                                                                                                                                 |
| Obesity                    | ASCs           | Yoshimura K. <i>et al.</i> , 2006<br>Cao M. <i>et al.</i> , 2015<br>Lee C.W. <i>et al.</i> , 2017                                                                                                                                                                                                                         |
|                            | iPSCs          | Kishida T. <i>et al.</i> , 2015                                                                                                                                                                                                                                                                                           |
|                            | NSCs           | Li J. <i>et al.</i> , 2014<br>Ren Z. <i>et al.</i> , 2020                                                                                                                                                                                                                                                                 |
|                            |                |                                                                                                                                                                                                                                                                                                                           |
| Lysosomal Storage Diseases | HSCs           | Dunbar C. <i>et al.</i> , 1996<br>Lönnqvist T. <i>et al.</i> , 2001<br>Biffi A. <i>et al.</i> , 2006<br>Yoshimitsu M. <i>et al.</i> , 2007<br>Enquist I.B. <i>et al.</i> , 2009<br>van Til N.P. <i>et al.</i> , 2010<br>Mynarek M. <i>et al.</i> , 2012<br>Biffi A. <i>et al.</i> , 2013<br>Sessa M. <i>et al.</i> , 2016 |
|                            | NSCs           | Snyder E. Y. <i>et al.</i> , 1995<br>Lacorazza H.D. <i>et al.</i> , 1996<br>Buchet D. <i>et al.</i> , 2002<br>Meng X. L. <i>et al.</i> , 2003<br>Shihabuddin L. S. <i>et al.</i> , 2004<br>Sidman R. L. <i>et al.</i> , 2007                                                                                              |
|                            | iPSCs          | Doerr J. <i>et al.</i> , 2015<br>Griffin, T. A. <i>et al.</i> , 2015<br>Meneghini V. <i>et al.</i> , 2017<br>Kobolak J. <i>et al.</i> , 2019<br>Clarke D. <i>et al.</i> , 2018                                                                                                                                            |
|                            |                |                                                                                                                                                                                                                                                                                                                           |
|                            |                |                                                                                                                                                                                                                                                                                                                           |
|                            |                |                                                                                                                                                                                                                                                                                                                           |
|                            |                |                                                                                                                                                                                                                                                                                                                           |

**Supplemental Table 1.** Landmark reports of stem cell (gene) therapy application in animal models and/or human patients for the different metabolic disorders. Abbreviations: iPSCs: induced Pluripotent Stem Cells; MSCs: Mesenchymal Stem Cells; ESCs: Embryonic Stem Cells; HSCs: Hematopoietic Stem Cells; ASCs: Adipose-derived mesenchymal Stem Cells; NSCs: Neuronal Stem Cells
